# Supplementary material for: Monoclonal IgG antibodies generated from joint-derived B cells of RA patients have a strong bias toward citrullinated autoantigen recognition
Source: PubMed Central journal article supplement — J Exp Med. 2013 Mar 11;210(3):445–55. doi: 10.1084/jem.20121486 (PMC3600900; doi:10.1084/jem.20121486), 2013-03-11
Supplement: supp_jem.20121486_JEM_20121486_sm.pdf [file supp_jem.20121486_JEM_20121486_sm.pdf]

## SUPPLEMENTAL MATERIAL

Amara et al., <http://www.jem.org/cgi/content/full/jem.20121486/DC1>**Table S1.** Patient characteristics

| Patient                 | Gender | Age | Disease duration | HLA-DR  | CCP2  | CEP-1 | cit-vim | cit-fib |
|-------------------------|--------|-----|------------------|---------|-------|-------|---------|---------|
|                         |        | yr  |                  |         | AU    | AU    | AU      | AU      |
| <b>ACPA<sup>+</sup></b> |        |     |                  |         |       |       |         |         |
| RA1325                  | F      | 47  | 11               | *01/*15 | 1,387 | 12    | 59      | 135     |
| RA1276                  | F      | 37  | 28               | *04/*14 | 533   | 267   | 97      | 72      |
| RA1103                  | F      | 37  | 3                | *04/*01 | 337   | 34    | 349     | 299     |
| <b>ACPA<sup>-</sup></b> |        |     |                  |         |       |       |         |         |
| RA663                   | F      | 41  | 17               | *01/*01 | 5     | 0     | 0       | 0       |
| RA1362                  | M      | 36  | 9                | *01/*03 | 9     | 0     | 2       | 0       |
| RA1026                  | F      | 41  | 6                | *01/*03 | 2.2   | 0     | 0       | 0       |

AU, arbitrary units. Patients were considered anti-CCP positive when their antibody titers in synovial fluid were >25 AU; patients were considered anti-CEP-1 positive when their antibody titers in synovial fluid were >3.5 AU; patients were considered cit-vim positive when their antibody titers in synovial fluid were >9 AU; patients were considered cit-fib positive when their antibody titers in synovial fluid were >7.2 AU.

**Table S2.** Kinetic rates and affinity of synovial IgG antibodies to CEP-1, cit-fib, and cit-vim measured by SPR

| Clone       | CEP-1                  |                         |                         |                | cit-fib                |                         |                        |                | cit-vim                |                         |                         |                |
|-------------|------------------------|-------------------------|-------------------------|----------------|------------------------|-------------------------|------------------------|----------------|------------------------|-------------------------|-------------------------|----------------|
|             | Ka                     | Kd                      | K <sub>d</sub>          | χ <sup>2</sup> | Ka                     | Kd                      | K <sub>d</sub>         | χ <sup>2</sup> | Ka                     | Kd                      | K <sub>d</sub>          | χ <sup>2</sup> |
|             | per M/s                | per s                   | M                       |                | per M/s                | per s                   | M                      |                | per M/s                | per s                   | M                       |                |
| 1103SF-A03  | 7.19 × 10 <sup>5</sup> | 0.0306                  | 4.3 × 10 <sup>-8</sup>  | 0.51           | 4.20 × 10 <sup>7</sup> | 0.6687                  | 1.5 × 10 <sup>-8</sup> | 0.14           | 5.37 × 10 <sup>6</sup> | 0.3233                  | 6.1 × 10 <sup>-8</sup>  | 3.28           |
| 1103SF-A04  | 5.93 × 10 <sup>5</sup> | 0.0050                  | 8.5 × 10 <sup>-9</sup>  | 1.11           | 1.42 × 10 <sup>3</sup> | 0.0079                  | 5.5 × 10 <sup>-6</sup> | 0.01           | 8.32 × 10 <sup>6</sup> | 0.2133                  | 2.6 × 10 <sup>-8</sup>  | 1.55           |
| 1103SF-B02  | 1.32 × 10 <sup>7</sup> | 0.0399                  | 3.1 × 10 <sup>-9</sup>  | 1.24           | 9.04 × 10 <sup>4</sup> | 9.11 × 10 <sup>-5</sup> | 1.1 × 10 <sup>-9</sup> | 0.01           | 9.97 × 10 <sup>5</sup> | 1.06 × 10 <sup>-4</sup> | 1.1 × 10 <sup>-10</sup> | 0.17           |
| 1103SF-B03  | 9.84 × 10 <sup>5</sup> | 0.1906                  | 1.9 × 10 <sup>-7</sup>  | 2.22           | 4.60 × 10 <sup>6</sup> | 0.0074                  | 1.6 × 10 <sup>-9</sup> | 2.75           | 1.01 × 10 <sup>5</sup> | 0.0901                  | 8.9 × 10 <sup>-7</sup>  | 4.21           |
| 1103SF-B04  | 7.63 × 10 <sup>4</sup> | 0.1694                  | 2.2 × 10 <sup>-6</sup>  | 7.21           | 9.16 × 10 <sup>4</sup> | 0.0017                  | 1.9 × 10 <sup>-8</sup> | 1.22           | 9.96 × 10 <sup>4</sup> | 0.0010                  | 1.1 × 10 <sup>-8</sup>  | 1.06           |
| 1104SF-H05  | 38.42                  | 9.48 × 10 <sup>-6</sup> | 2.5 × 10 <sup>-7</sup>  | 0.01           | 23.67                  | 3.06 × 10 <sup>-5</sup> | 1.2 × 10 <sup>-6</sup> | 0.13           | 35.20                  | 5.57 × 10 <sup>-7</sup> | 1.6 × 10 <sup>-8</sup>  | 0.09           |
| 1276SF-A09  | 7.34 × 10 <sup>5</sup> | 0.2452                  | 3.3 × 10 <sup>-7</sup>  | 3.52           | 1.80 × 10 <sup>5</sup> | 0.0291                  | 1.6 × 10 <sup>-7</sup> | 0.98           | 2.34 × 10 <sup>5</sup> | 0.0433                  | 1.8 × 10 <sup>-7</sup>  | 2.23           |
| 1276SF-B01  | 1.72 × 10 <sup>3</sup> | 1.09 × 10 <sup>-5</sup> | 6.3 × 10 <sup>-9</sup>  | 0.79           | 1.09 × 10 <sup>6</sup> | 0.0248                  | 2.2 × 10 <sup>-8</sup> | 0.05           | 2.12 × 10 <sup>5</sup> | 0.0971                  | 4.6 × 10 <sup>-7</sup>  | 0.27           |
| 1276SF-C07  | 5.62 × 10 <sup>5</sup> | 0.0354                  | 2.7 × 10 <sup>-8</sup>  | 0.34           | 1.16 × 10 <sup>3</sup> | 6.43 × 10 <sup>-4</sup> | 5.5 × 10 <sup>-7</sup> | 1.68           | 1.52 × 10 <sup>3</sup> | 2.39 × 10 <sup>-3</sup> | 1.6 × 10 <sup>-6</sup>  | 0.01           |
| 1276SF-D10  | 2.16 × 10 <sup>7</sup> | 0.0128                  | 5.9 × 10 <sup>-10</sup> | 0.64           | 8.93 × 10 <sup>6</sup> | 0.0268                  | 3.1 × 10 <sup>-9</sup> | 0.01           | 1.04 × 10 <sup>7</sup> | 0.1612                  | 1.5 × 10 <sup>-8</sup>  | 0.73           |
| 1276SF-F12  | 1.42 × 10 <sup>7</sup> | 0.4386                  | 3.1 × 10 <sup>-8</sup>  | 5.91           | 1.02 × 10 <sup>3</sup> | 0.0393                  | 3.8 × 10 <sup>-5</sup> | 0.18           | 2.46 × 10 <sup>5</sup> | 0.0790                  | 3.2 × 10 <sup>-7</sup>  | 5.77           |
| 1276SF-G08  | 5.99 × 10 <sup>5</sup> | 0.1128                  | 1.8 × 10 <sup>-7</sup>  | 3.82           | 7.52 × 10 <sup>4</sup> | 9.77 × 10 <sup>-5</sup> | 1.3 × 10 <sup>-9</sup> | 0.01           | 1.66 × 10 <sup>5</sup> | 0.0011                  | 6.9 × 10 <sup>-9</sup>  | 0.12           |
| 1276SF-H10  | 2.79 × 10 <sup>4</sup> | 0.0785                  | 2.8 × 10 <sup>-6</sup>  | 0.05           | 3.27 × 10 <sup>3</sup> | 0.0069                  | 2.1 × 10 <sup>-6</sup> | 0.01           | 1.68 × 10 <sup>5</sup> | 0.0271                  | 1.6 × 10 <sup>-7</sup>  | 0.03           |
| 1325SF-B109 | 5.82 × 10 <sup>6</sup> | 0.0523                  | 9.0 × 10 <sup>-9</sup>  | 0.01           | 4.57 × 10 <sup>6</sup> | 0.2939                  | 6.4 × 10 <sup>-8</sup> | 0.89           | 1.16 × 10 <sup>5</sup> | 0.0292                  | 2.5 × 10 <sup>-7</sup>  | 0.01           |
| 1325SF-B117 | 4.94 × 10 <sup>4</sup> | 0.0197                  | 4.1 × 10 <sup>-7</sup>  | 0.02           | 2.37 × 10 <sup>4</sup> | 0.0120                  | 5.1 × 10 <sup>-7</sup> | 0.03           | 3.48 × 10 <sup>4</sup> | 0.0152                  | 3.9 × 10 <sup>-7</sup>  | 0.02           |
| 1325SF-C127 | 2.60 × 10 <sup>4</sup> | 0.0352                  | 1.3 × 10 <sup>-6</sup>  | 0.01           | 1.05 × 10 <sup>4</sup> | 0.0284                  | 2.7 × 10 <sup>-6</sup> | 0.01           | 2.08 × 10 <sup>4</sup> | 0.0324                  | 1.5 × 10 <sup>-6</sup>  | 0.12           |
| 1325SF-B07  | 1.37 × 10 <sup>4</sup> | 0.0199                  | 1.4 × 10 <sup>-6</sup>  | 0.01           | 9.97 × 10 <sup>3</sup> | 0.0014                  | 1.5 × 10 <sup>-7</sup> | 0.01           | 7.16 × 10 <sup>3</sup> | 0.0267                  | 3.7 × 10 <sup>-6</sup>  | 0.01           |
| 1325SF-H07  | 3.71 × 10 <sup>4</sup> | 7.34 × 10 <sup>-3</sup> | 1.9 × 10 <sup>-8</sup>  | 0.03           | 6.37 × 10 <sup>3</sup> | 4.01 × 10 <sup>-4</sup> | 6.3 × 10 <sup>-8</sup> | 0.04           | 1.02 × 10 <sup>5</sup> | 0.0019                  | 1.9 × 10 <sup>-8</sup>  | 0.79           |

Ka, association rate; Kd, dissociation rate; M, mol/l. A χ<sup>2</sup> value < 10 indicates that the fitting model used adequately describes the experimental data.

Table S3, included as a separate Excel file, shows sequence data and reactivity of IgG antibodies from synovial memory B cells of RA patients.
